# Supplementary figures and images for: Control of TSC2-Rheb signaling axis by arginine regulates mTORC1 activity
Source: eLife journal article supplement (doi:10.7554/elife.11058), 2016-01-07

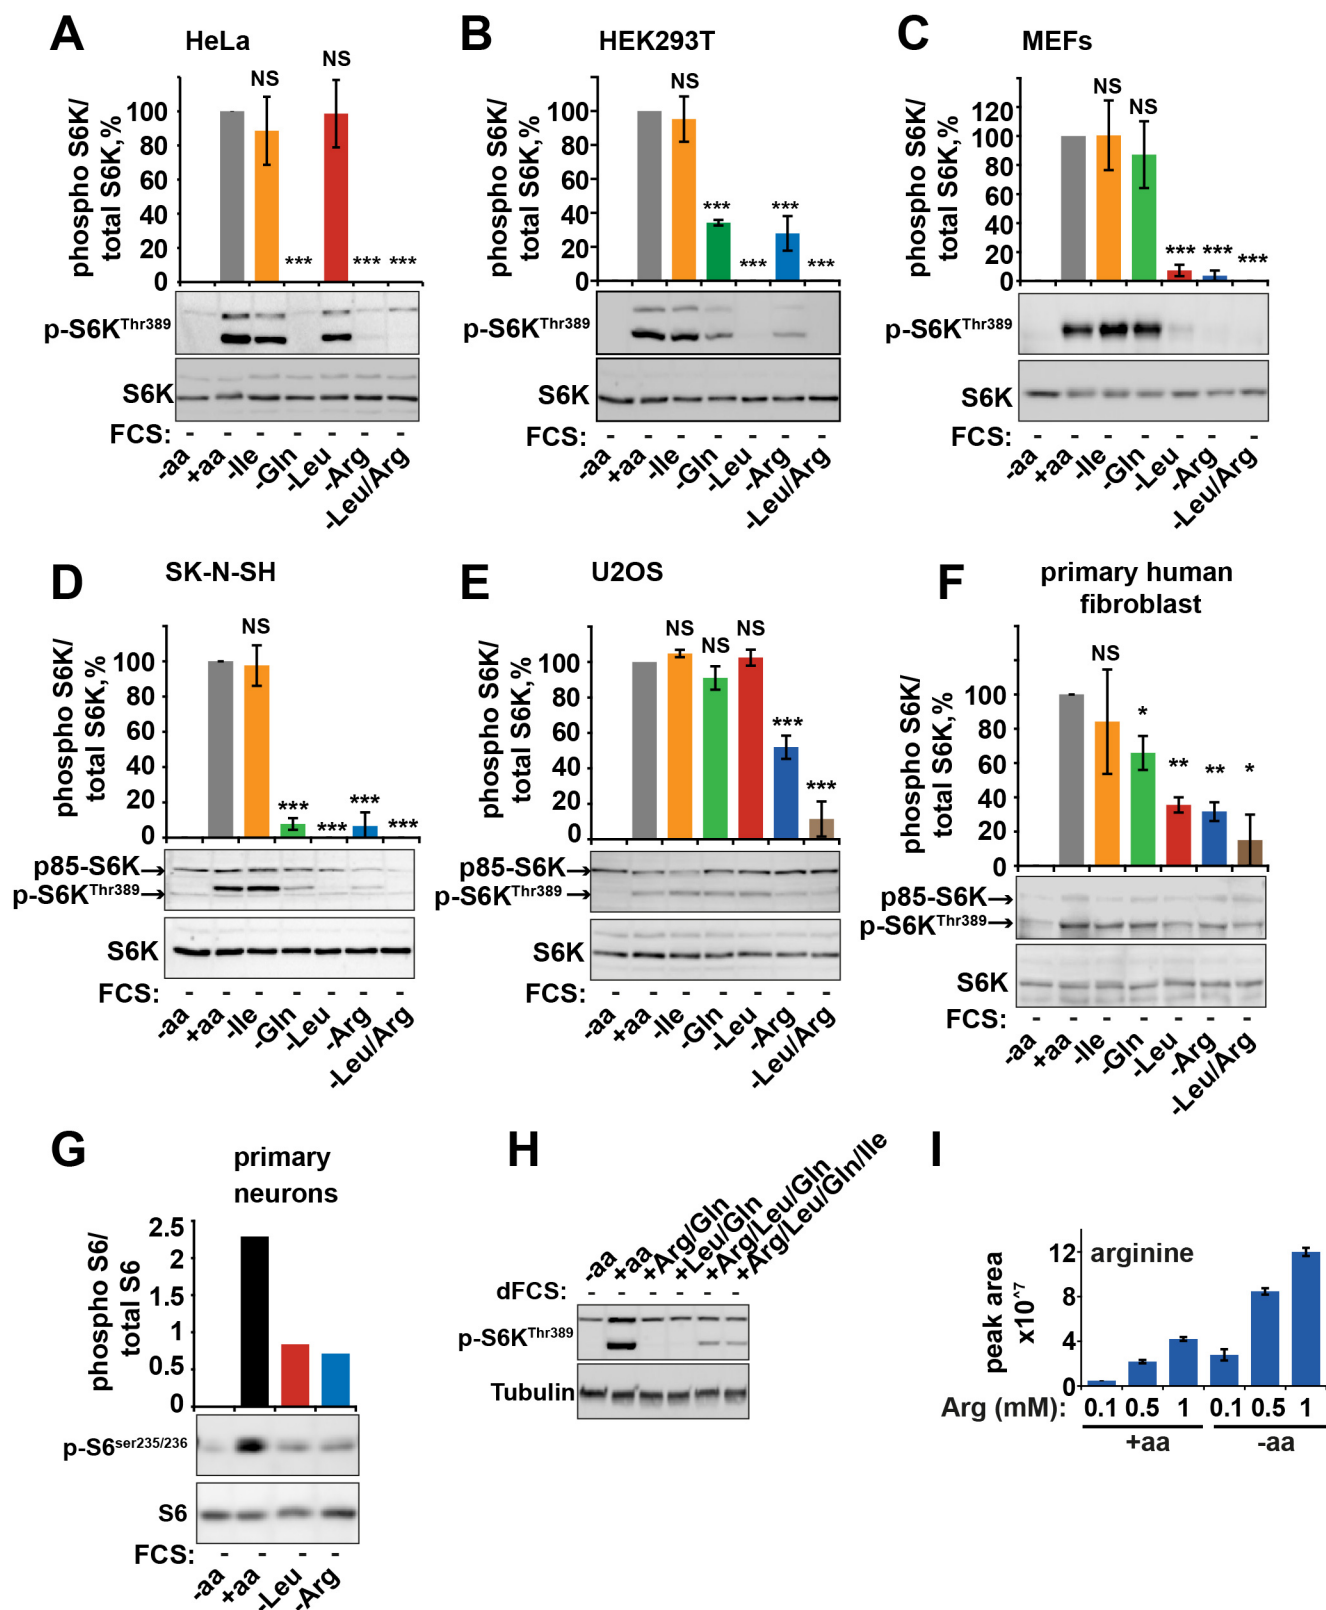

Figure 1-figure supplement 1

Supplement: supp [file elife_poa_e11058_Figure_1_figure_supplement_1.pdf › elife_poa_e11058_Figure_1_figure_supplement_1.pdf]

**A**

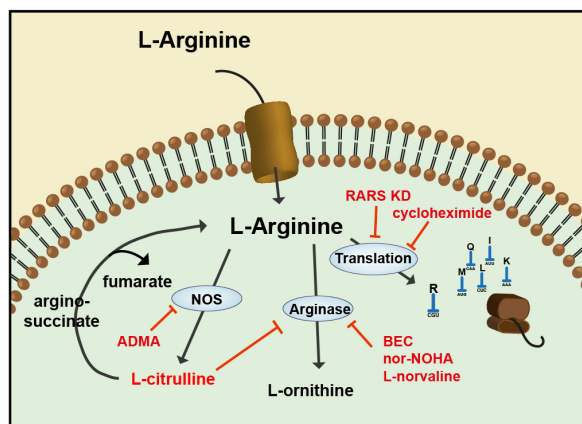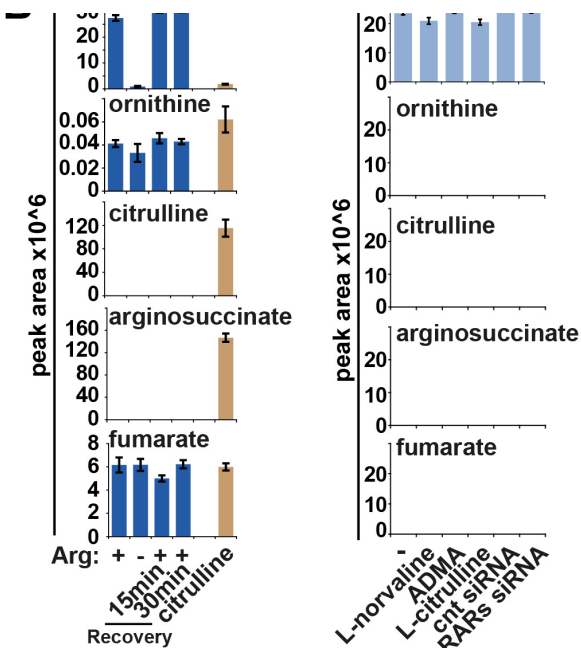

**D**

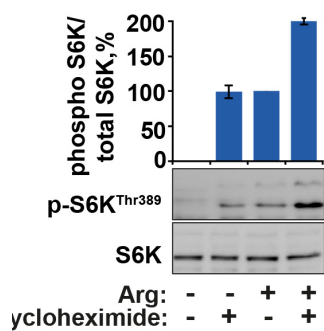

**E**

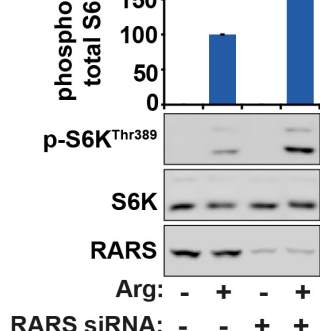

**F**

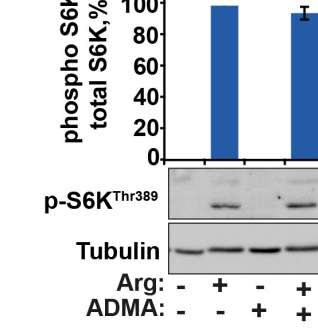

**G**

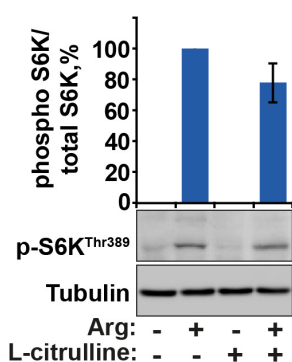

**H**

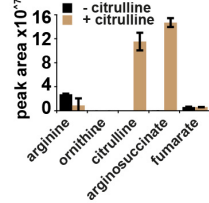

**I**

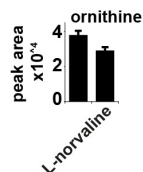

**J**

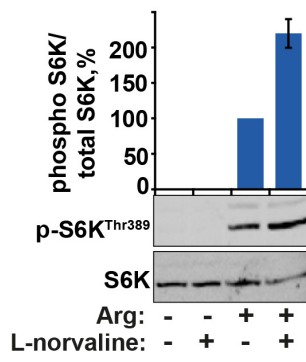

Figure 1-figure supplement 2

Supplement: supp [file elife_poa_e11058_Figure_1_figure_supplement_2.pdf › elife_poa_e11058_Figure_1_figure_supplement_2.pdf]

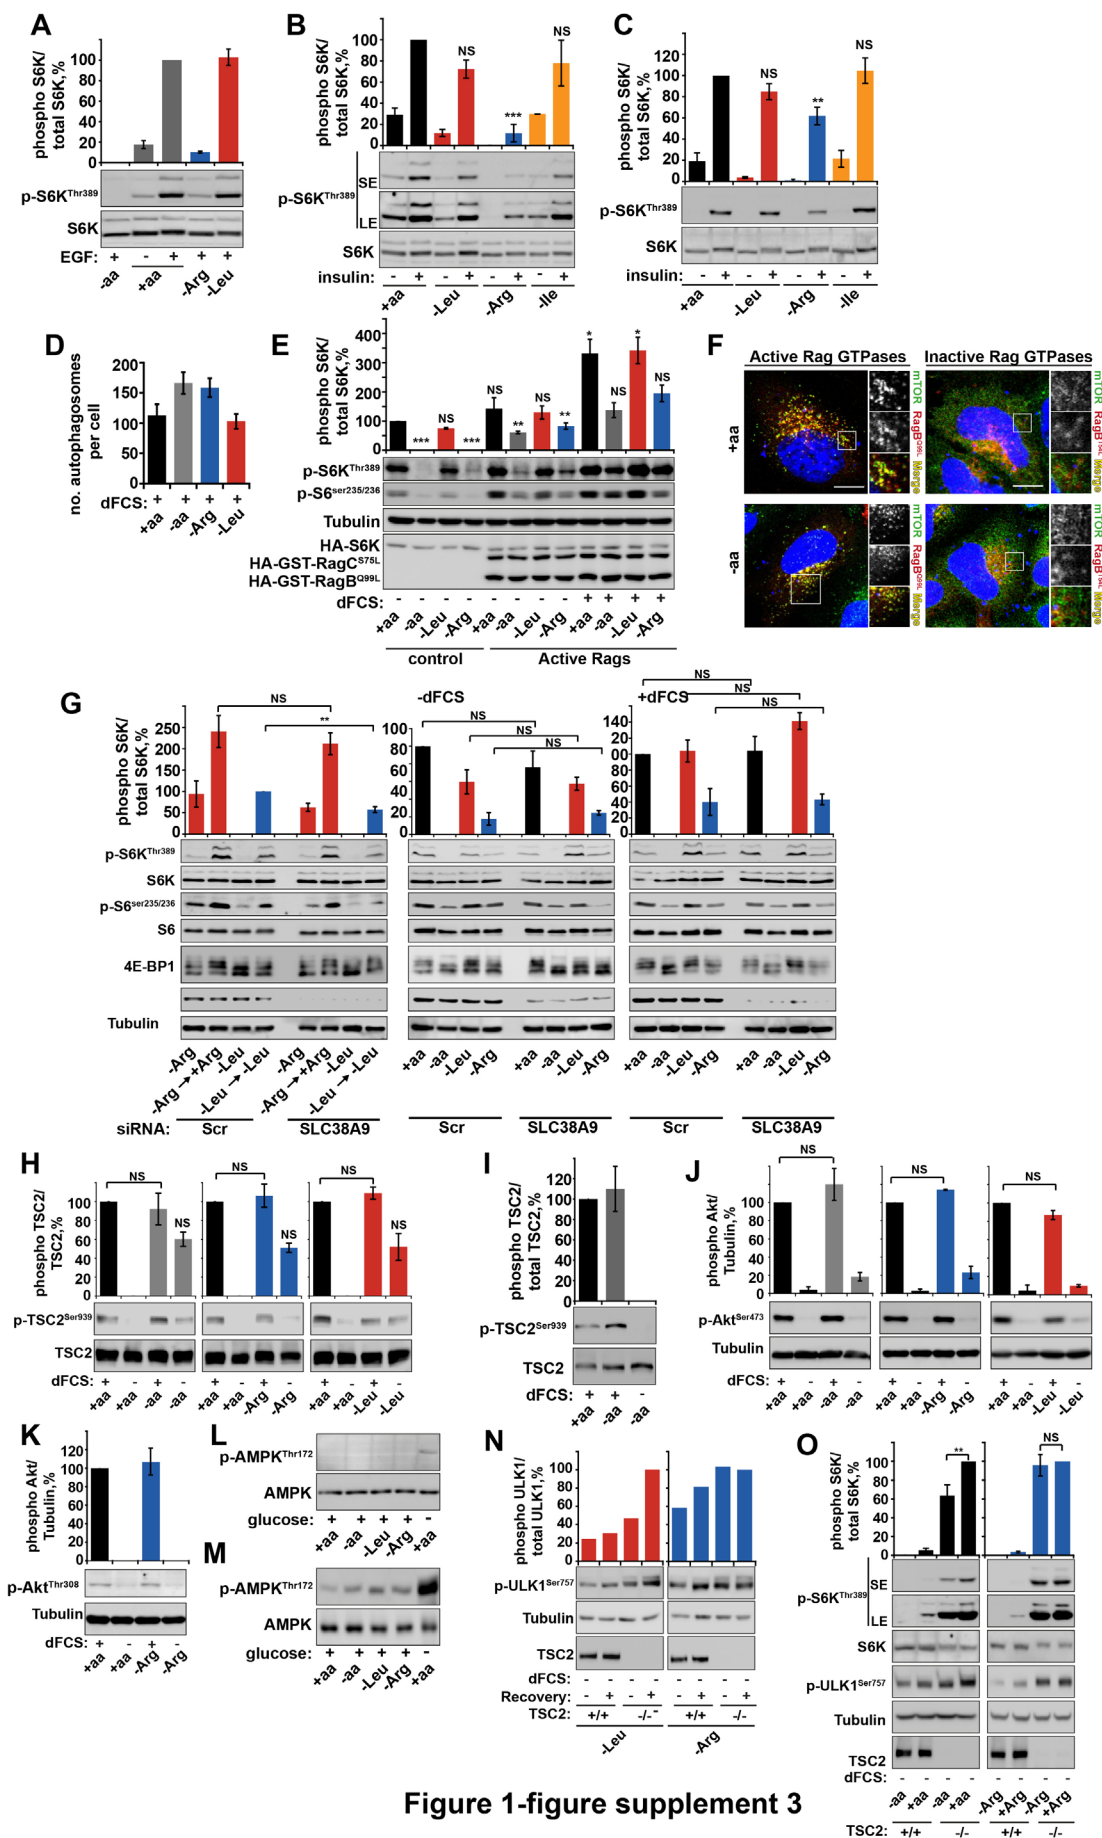

Figure 1-figure supplement 3

Supplement: supp [file elife_poa_e11058_Figure_1_figure_supplement_3.pdf › elife_poa_e11058_Figure_1_figure_supplement_3.pdf]

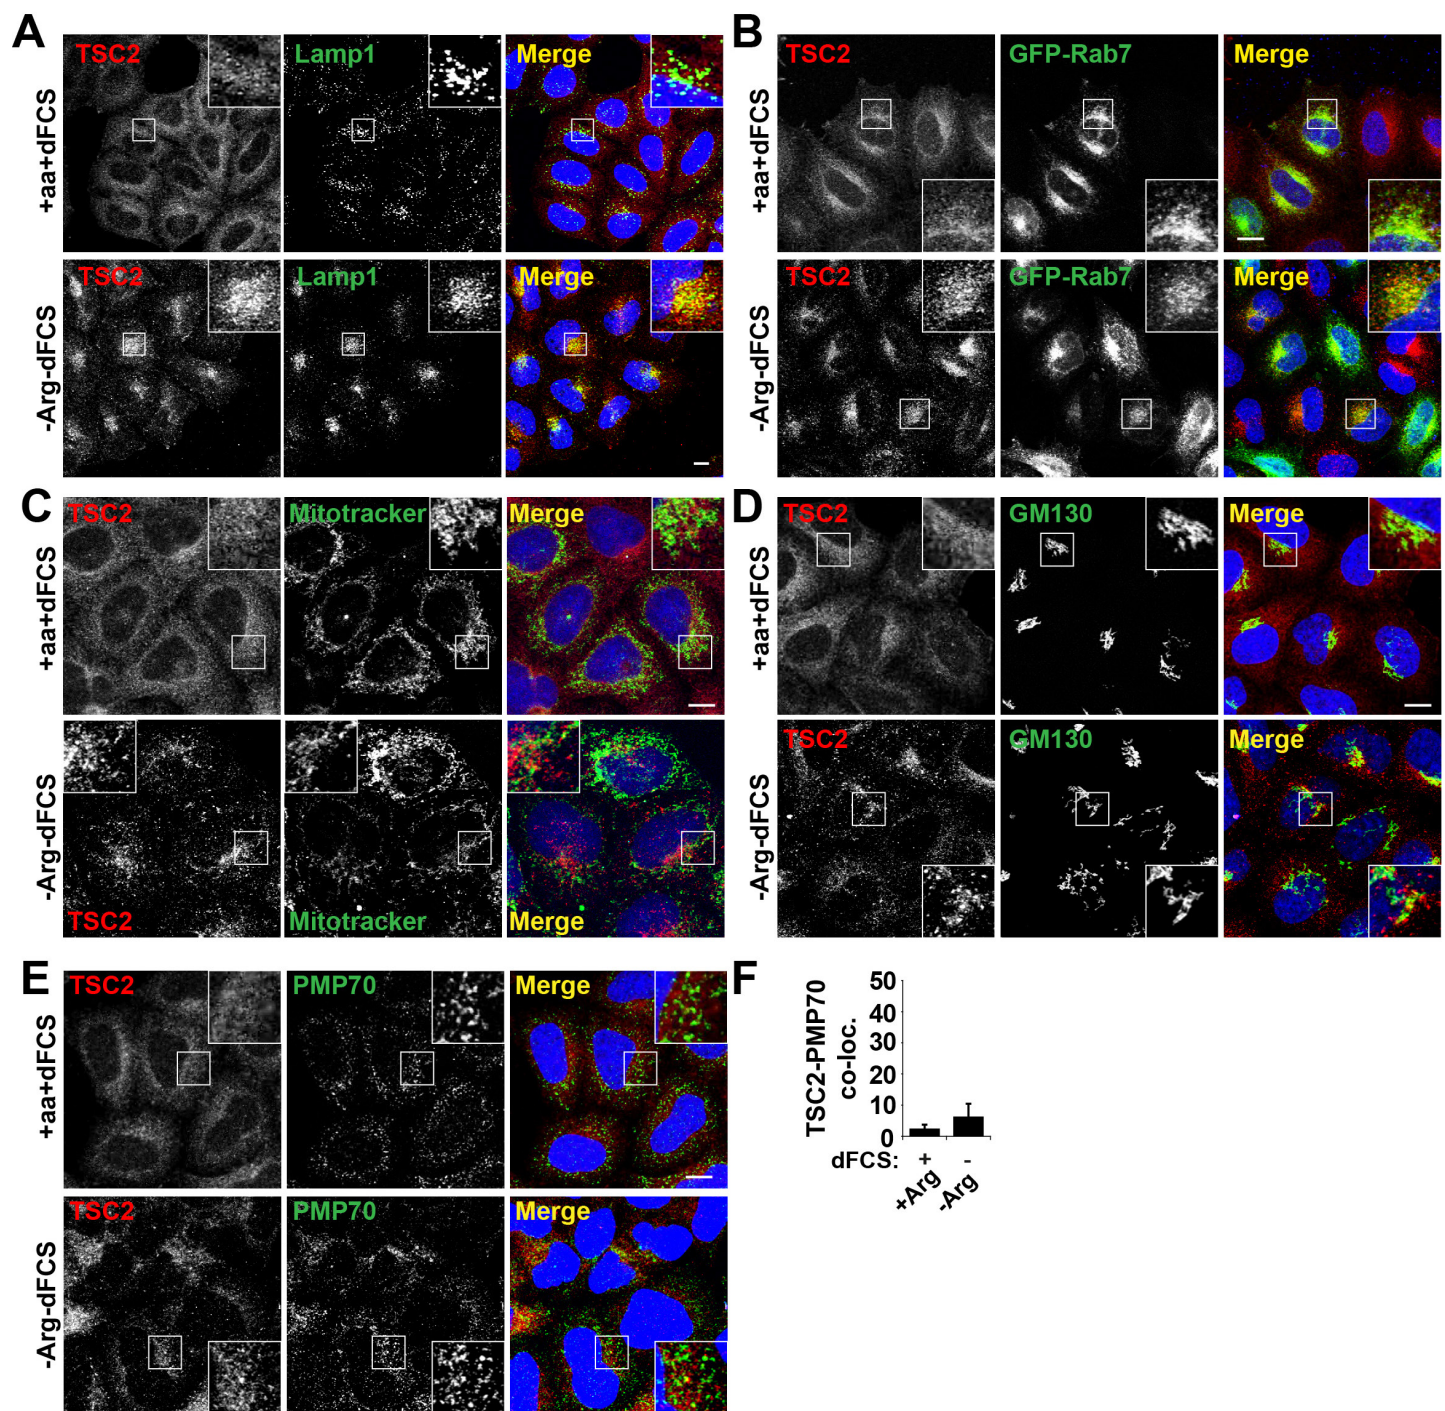

Figure 2-figure supplement 1

Supplement: supp [file elife_poa_e11058_Figure_2_figure_supplement_1.pdf › elife_poa_e11058_Figure_2_figure_supplement_1.pdf]

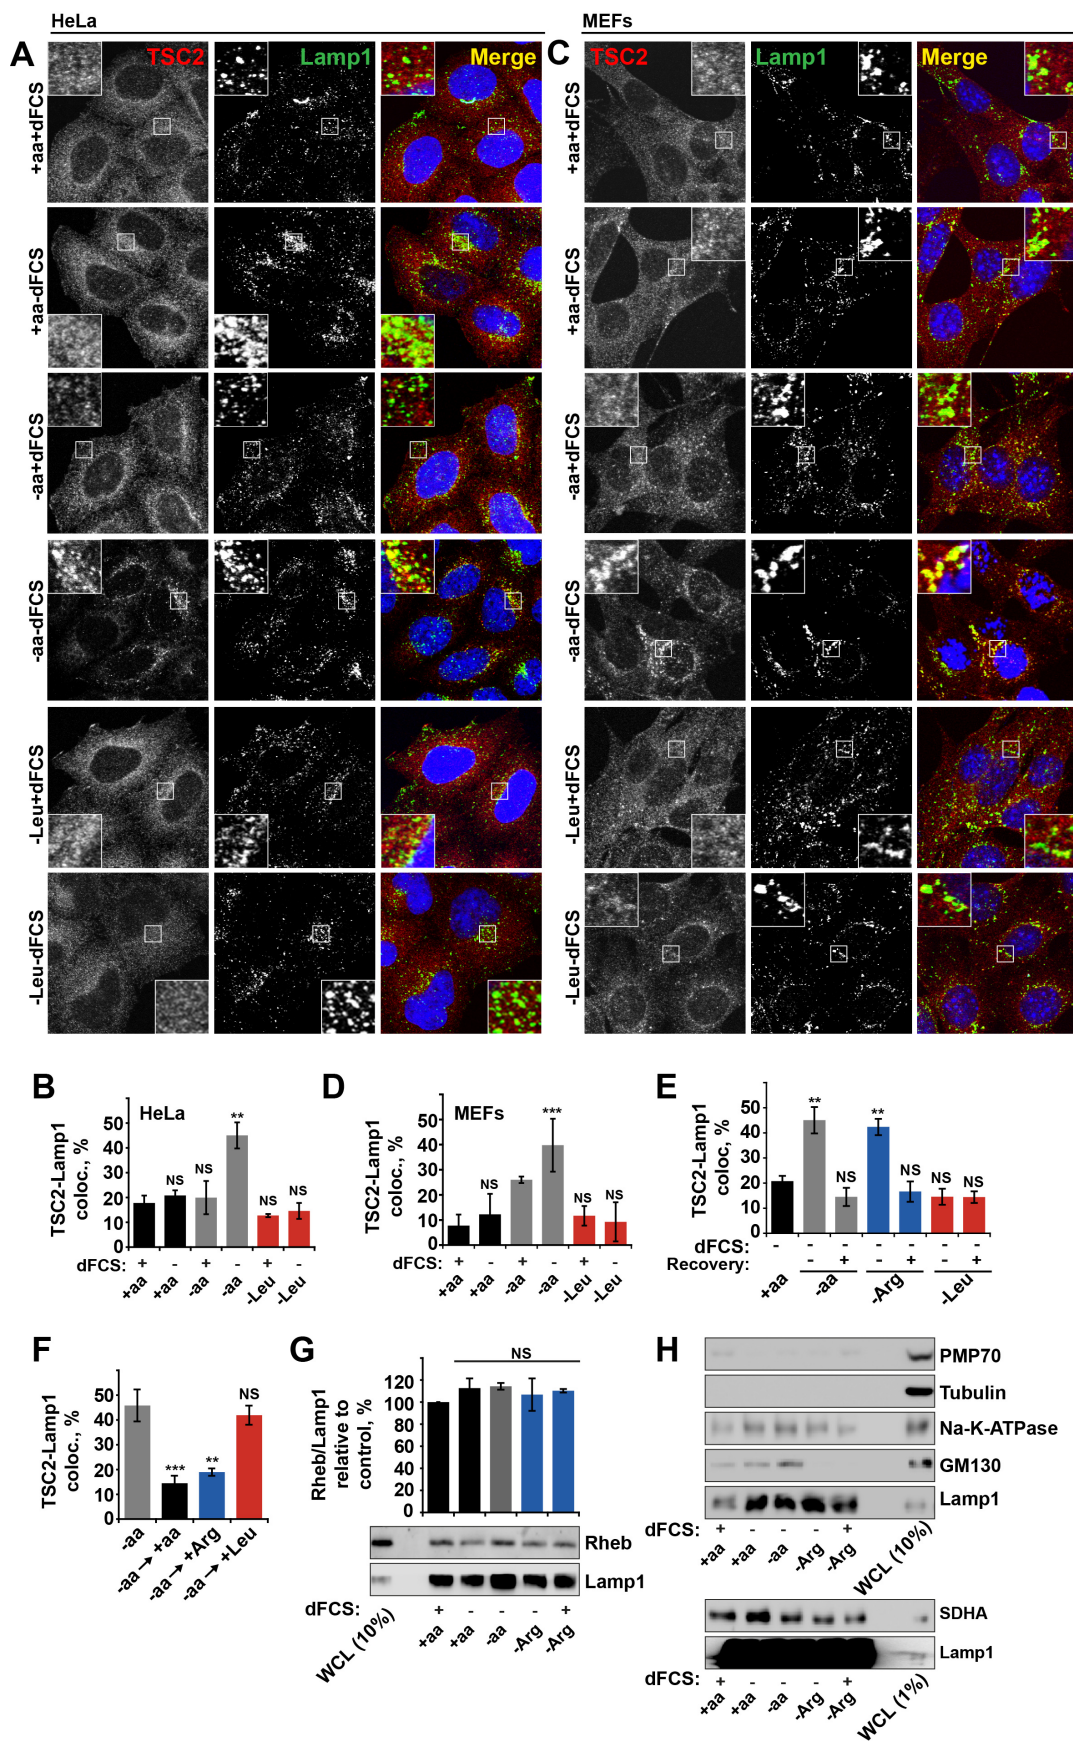

Figure 2-figure supplement 2

Supplement: supp [file elife_poa_e11058_Figure_2_figure_supplement_2.pdf › elife_poa_e11058_Figure_2_figure_supplement_2.pdf]

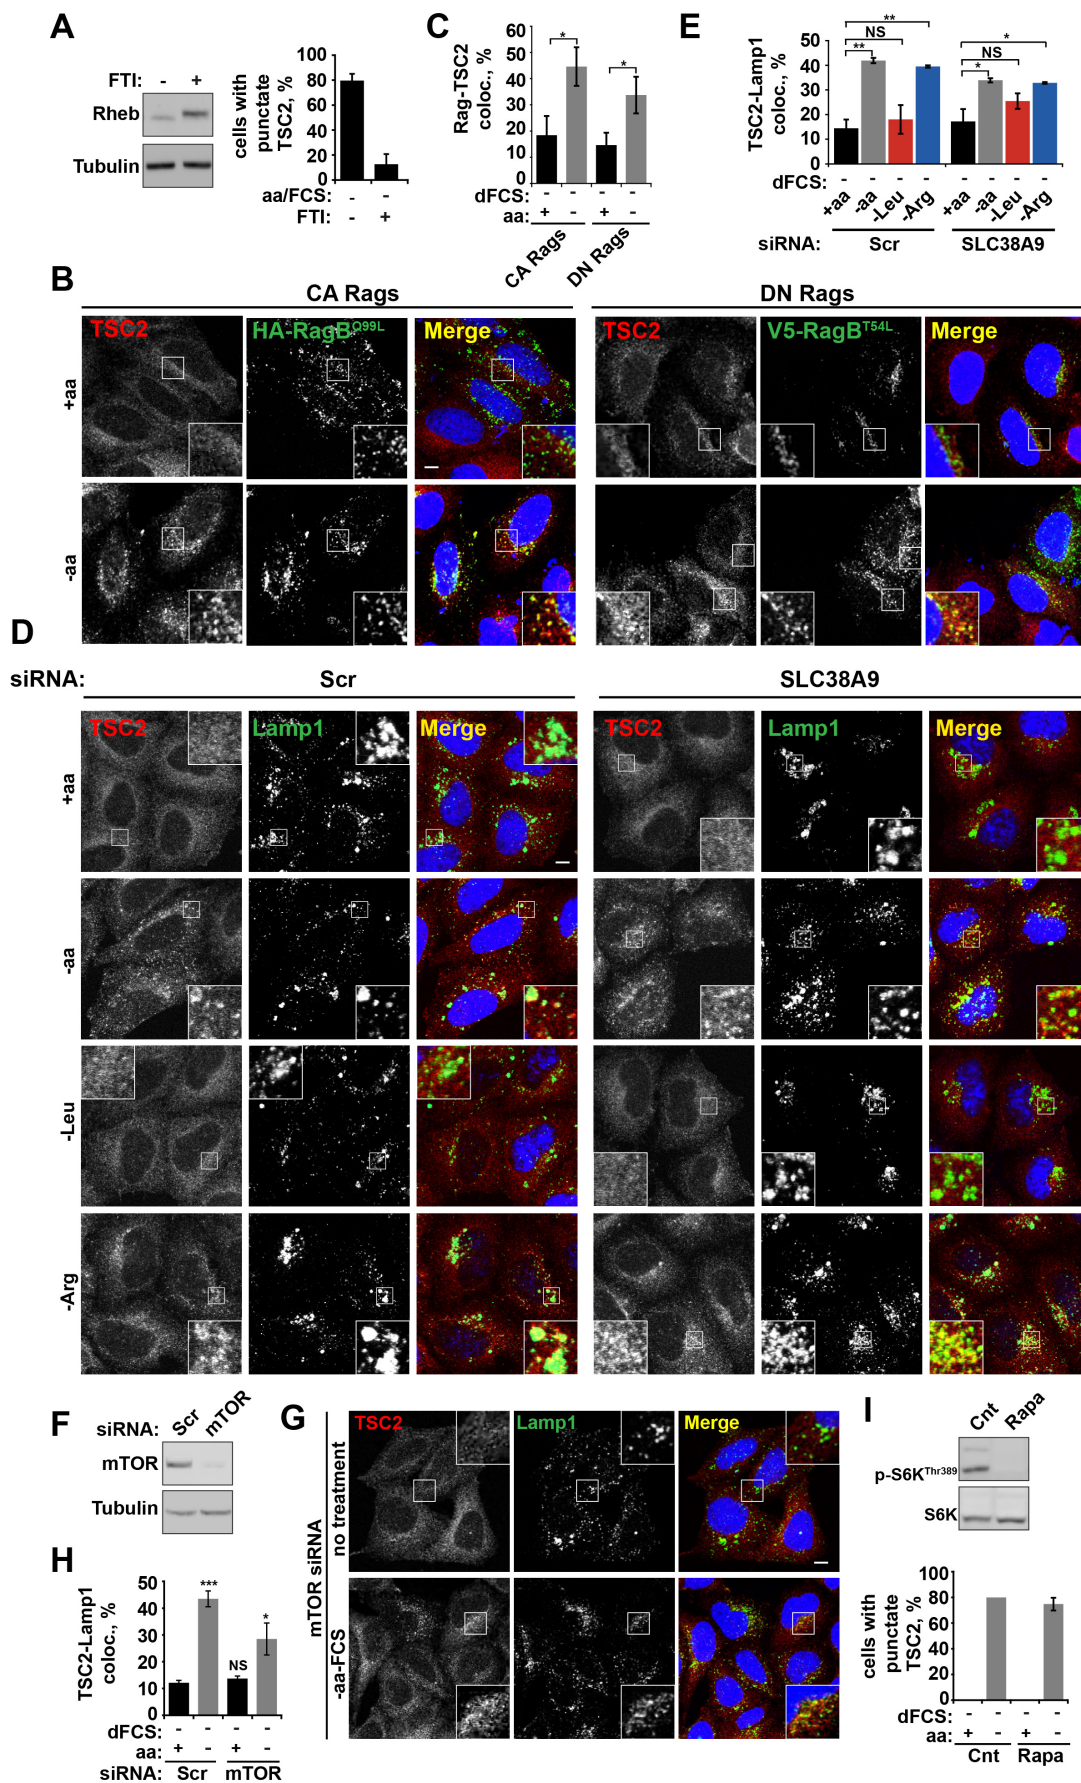

Figure 3-figure supplement 1

Supplement: supp [file elife_poa_e11058_Figure_3_figure_supplement_1.pdf › elife_poa_e11058_Figure_3_figure_supplement_1.pdf]

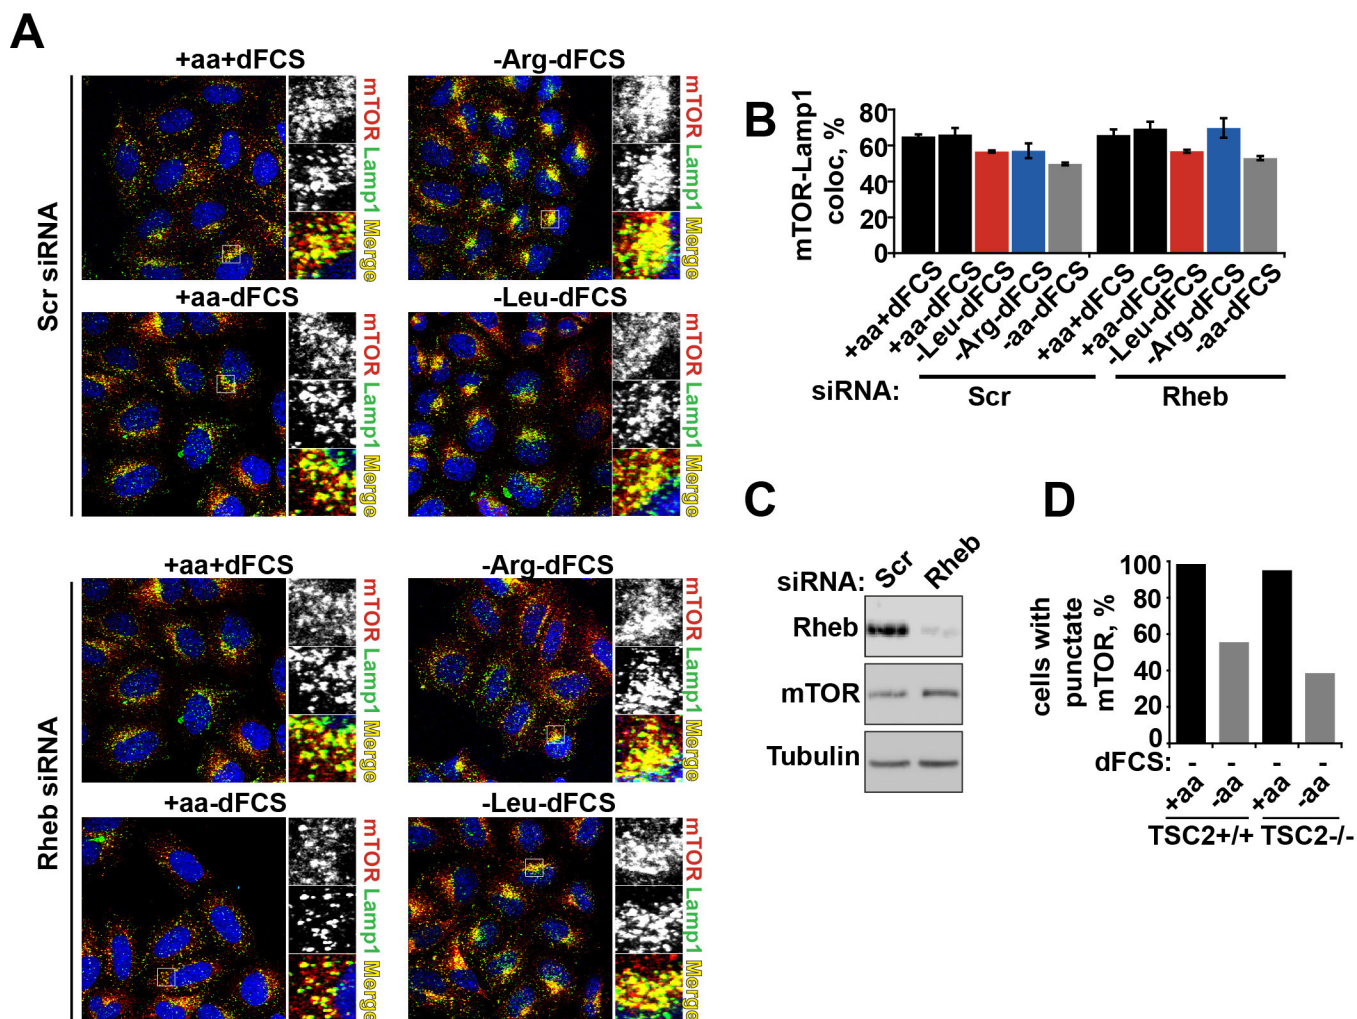

**Figure 3-figure supplement 2**

Supplement: supp [file elife_poa_e11058_Figure_3_figure_supplement_2.pdf › elife_poa_e11058_Figure_3_figure_supplement_2.pdf]

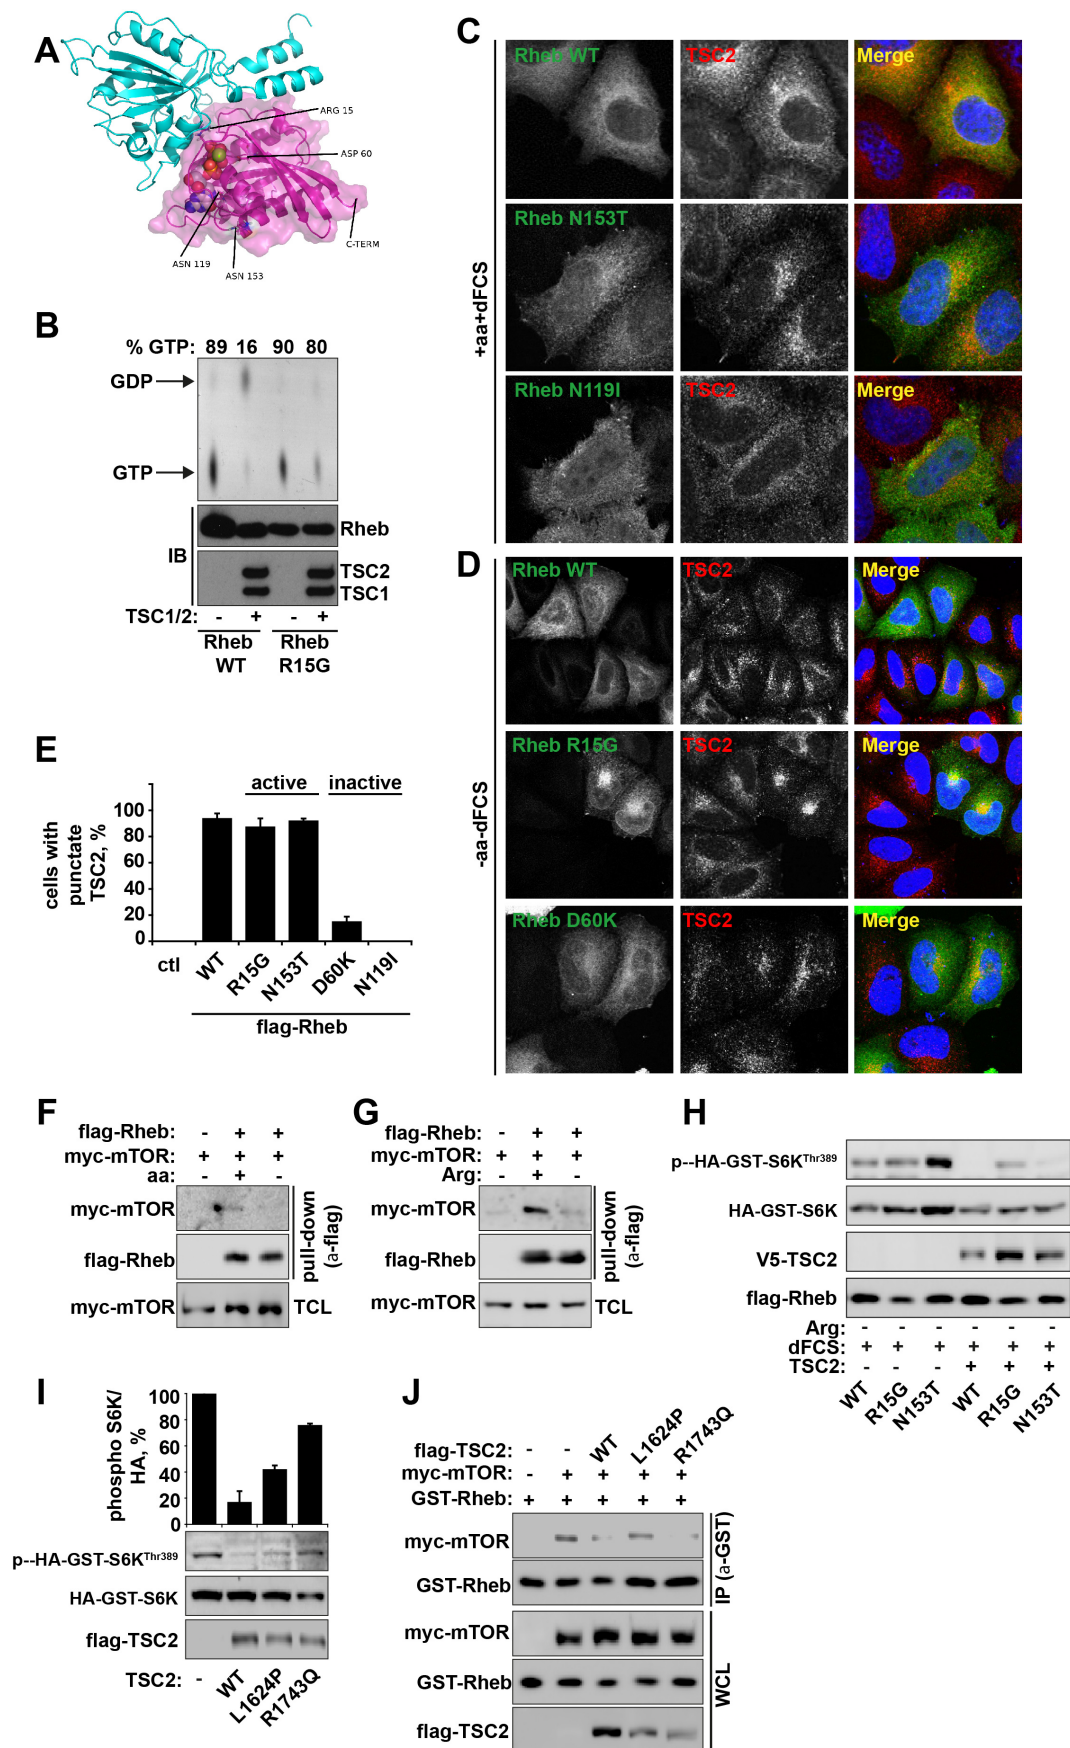

Figure 4-figure suppl

Supplement: supp [file elife_poa_e11058_Figure_4_figure_supplement_1.pdf › elife_poa_e11058_Figure_4_figure_supplement_1.pdf]

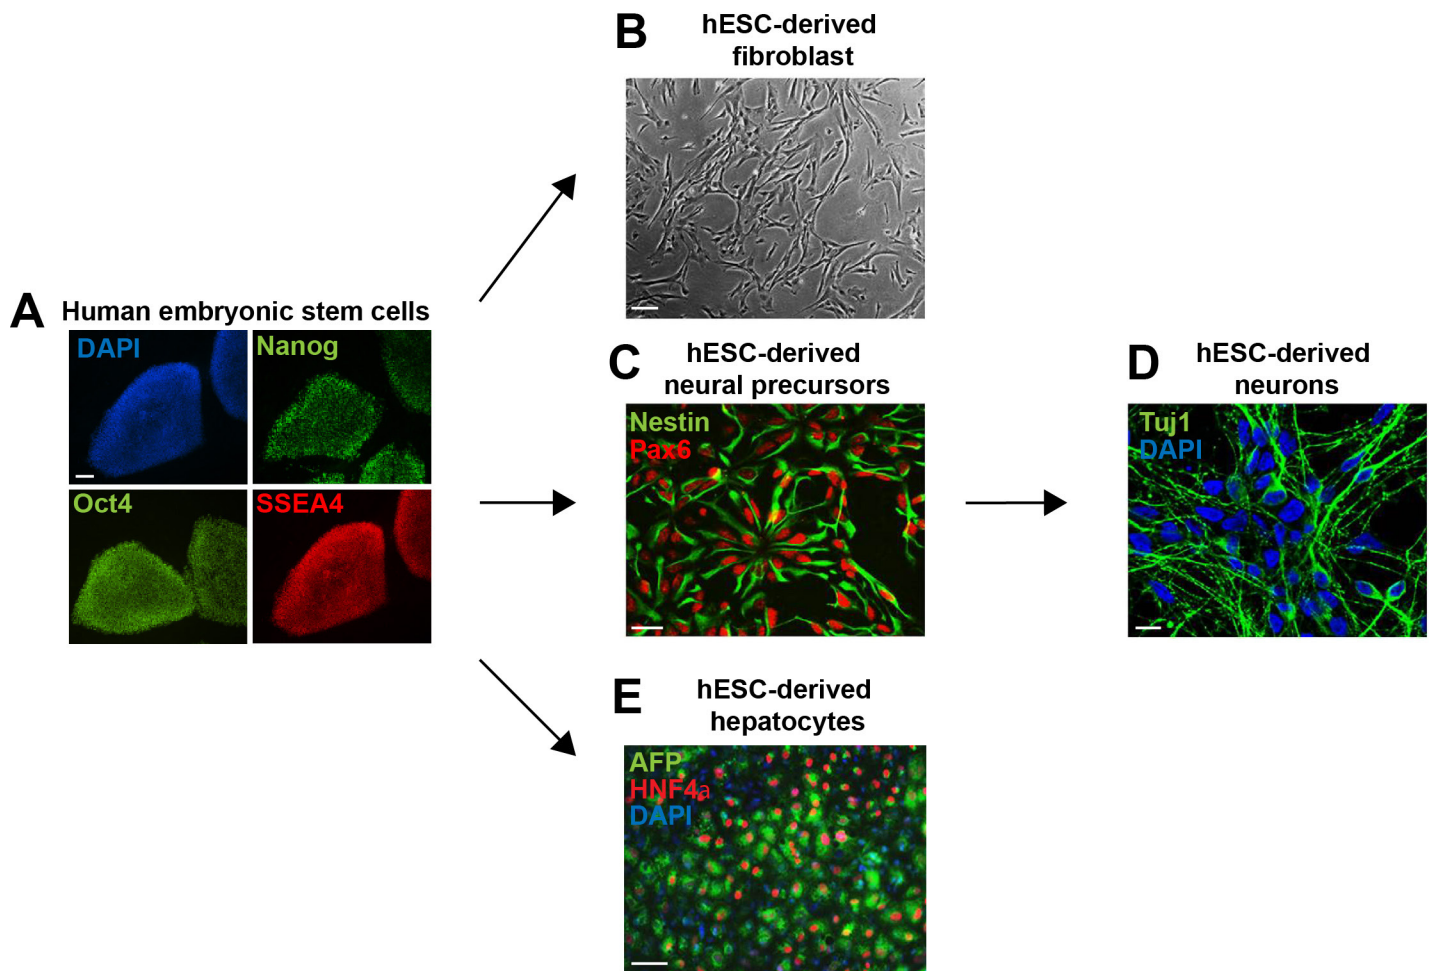

Figure 5-figure supplement 1

Supplement: supp [file elife_poa_e11058_Figure_5_figure_supplement_1.pdf › elife_poa_e11058_Figure_5_figure_supplement_1.pdf]
